# Supplementary material for: Impact of Proton Irradiation on Medium Density Polyethylene/Carbon Nanocomposites for Space Shielding Applications
Source: MDPI journal article supplement (doi:10.3390/nano13071288), 2023-04-06
Supplement: s1 [file s1]

# **Impact of Proton Irradiation on Medium Density Polyethylene/Carbon Nanocomposites for Space Shielding Applications**

**Federica Zaccardi <sup>1,†</sup>, Elisa Toto <sup>2,†</sup>, Shreya Rastogi <sup>3</sup>, Valeria La Saponara <sup>3</sup>, Maria Gabriella Santonicola <sup>2</sup> and Susanna Laurenzi <sup>1,\*</sup>**

<sup>1</sup> Department of Astronautical Electrical and Energy Engineering, Sapienza University of Rome, Via Salaria 851-881, 00138 Rome, Italy; federica.zaccardi@uniroma1.it

<sup>2</sup> Department of Chemical Engineering Materials Environment, Sapienza University of Rome, Via del Castro Laurenziano 7, 00161 Rome, Italy; elisa.toto@uniroma1.it (E.T.); mariagabriella.santonicola@uniroma1.it (M.G.S.)

<sup>3</sup> Department of Mechanical and Aerospace Engineering, University of California Davis, One Shields Ave, Davis, CA 95616, USA; vlasaponara@ucdavis.edu (V.L.S.)

\* Correspondence: susanna.laurenzi@uniroma1.it

† These authors contributed equally.

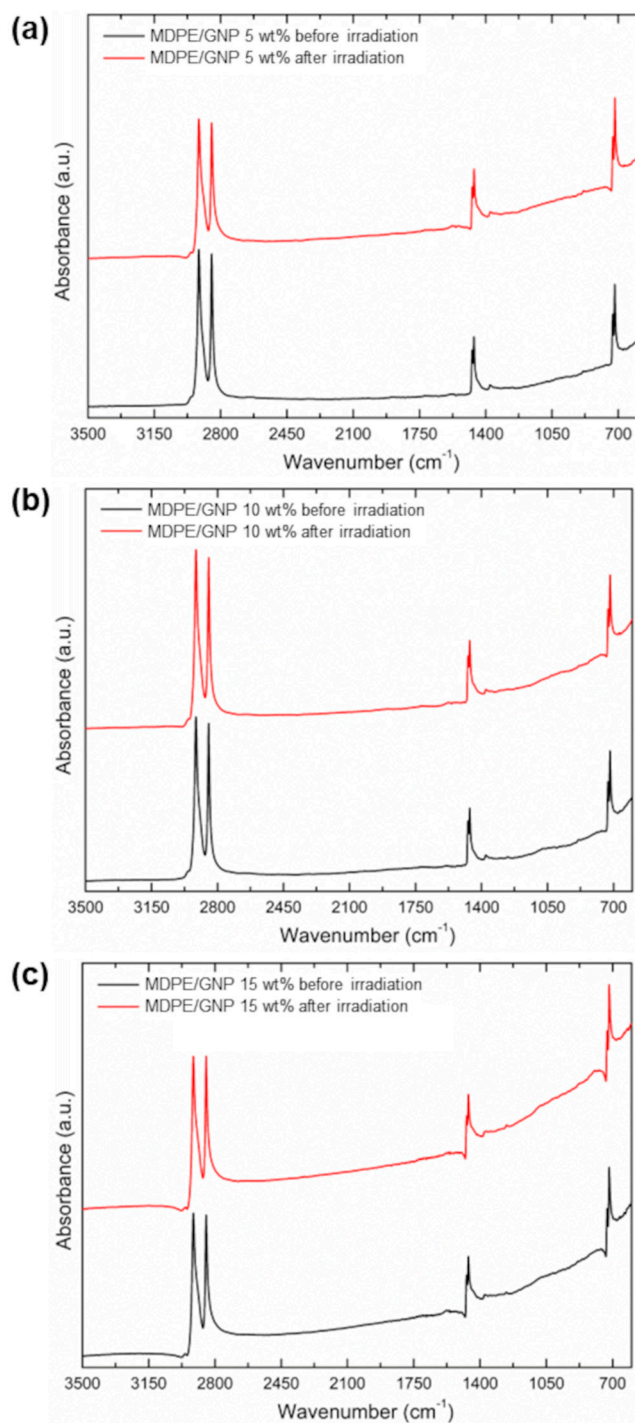

**Figure S1.** ATR-FTIR spectra (raw data) of **(a)** MDPE/GNP 5 wt%, **(b)** MDPE/GNP 10 wt% and **(c)** MDPE/GNP 15 wt% nanocomposites before and after proton irradiation. Data are offset for clarity.

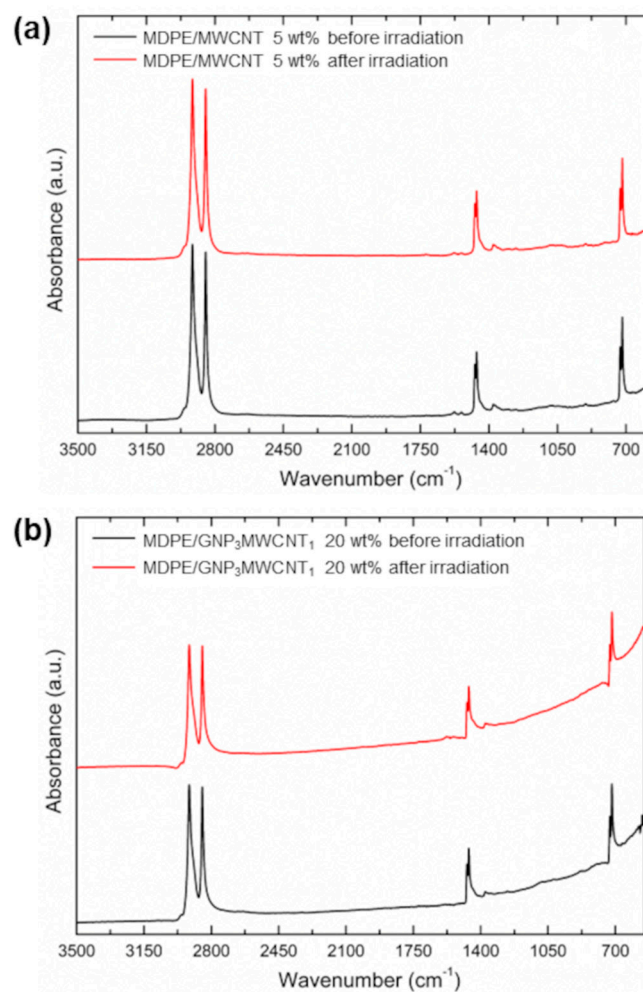

**Figure S2.** ATR-FTIR spectra (raw data) of (a) MDPE/MWCNT 5 wt% and (b) MDPE/GNP<sub>3</sub>MWCNT<sub>1</sub> 20 wt% nanocomposites before and after proton irradiation. Data are offset for clarity.

**Table S1.** ATR-FTIR data of non-irradiated and irradiated nanocomposites: intensities of the 729 cm<sup>-1</sup> (I<sub>a</sub>) and 718 cm<sup>-1</sup> (I<sub>b</sub>) peaks and their ratio (I<sub>a</sub>/I<sub>b</sub>).

| <b>Non-irradiated</b>                           | <b>I<sub>a</sub></b> | <b>I<sub>b</sub></b> | <b>I<sub>a</sub>/I<sub>b</sub></b> |
|-------------------------------------------------|----------------------|----------------------|------------------------------------|
| MDPE/GNP 5 wt%                                  | 0.133                | 0.211                | 0.630                              |
| MDPE/GNP 10 wt%                                 | 0.129                | 0.209                | 0.617                              |
| MDPE/GNP 15 wt%                                 | 0.126                | 0.233                | 0.541                              |
| MDPE/MWCNT 5 wt%                                | 0.138                | 0.212                | 0.651                              |
| MDPE/GNP <sub>3</sub> MWCNT <sub>1</sub> 20 wt% | 0.118                | 0.199                | 0.593                              |
| <b>Irradiated</b>                               | <b>I<sub>a</sub></b> | <b>I<sub>b</sub></b> | <b>I<sub>a</sub>/I<sub>b</sub></b> |
| MDPE/GNP 5 wt%                                  | 0.148                | 0.249                | 0.594                              |
| MDPE/GNP 10 wt%                                 | 0.126                | 0.215                | 0.586                              |
| MDPE/GNP 15 wt%                                 | 0.133                | 0.252                | 0.528                              |
| MDPE/MWCNT 5 wt%                                | 0.133                | 0.208                | 0.639                              |
| MDPE/GNP <sub>3</sub> MWCNT <sub>1</sub> 20 wt% | 0.105                | 0.187                | 0.561                              |

I<sub>a</sub>: intensity of the band at 729 cm<sup>-1</sup>; I<sub>b</sub>: intensity of the band at 718 cm<sup>-1</sup>
